# Supplementary material for: Frequency-Dependent Action of Neuromodulation
Source: eNeuro. 2021 Nov 8;8(6):ENEURO.0338-21.2021. doi: 10.1523/ENEURO.0338-21.2021 (PMC8584230; doi:10.1523/ENEURO.0338-21.2021)
Supplement: Extended Data Figure 2-2 — Data for panel Cii. Download Figure 2-2, XLSX file. [file enu-eN-NWR-0338-21-s06.xlsx]

## Sheet: Tabelle1
slope	50 mV/s	100 mV/s	200 mV/s	400 mV/s	50 mV/s	100 mV/s	200 mV/s	400 mV/s		50 mV/s	100 mV/s	200 mV/s	400 mV/s	50 mV/s	100 mV/s	200 mV/s	400 mV/s
direction	positive	positive	positive	positive	negative	negative	negative	negative		positive	positive	positive	positive	negative	negative	negative	negative
Experiment	I_max (nA)	I_max (nA)	I_max (nA)	I_max (nA)	I_max (nA)	I_max (nA)	I_max (nA)	I_max (nA)		V_I_max (mV)	V_I_max (mV)	V_I_max (mV)	V_I_max (mV)	V_I_max (mV)	V_I_max (mV)	V_I_max (mV)	V_I_max (mV)
138_111	-1.26833	-3.05361	-4.95914	-5.80748	-1.77072	-1.53469	-1.5448	-1.18239		-22.5832	-15.9907	-10.2672	-3.76114	-18.7443	-12.6659	-12.317	-22.8502
138_114	-3.62768	-5.24126	-7.61383	-10.1129	-3.32463	-2.8924	-2.81878	-2.63251		-5.82066	-4.23549	-0.605561	3.88075	-11.5359	-7.67347	-8.52353	-5.00003
138_115	-2.39206	-3.08708	-5.87474	-6.04881	-0.0156243	-2.04412	-2.02923	-2.52003		-9.82081	-15.188	-8.8561	-5.33415	-0.150813	-10.0131	-10.1417	-10.8442
138_125	-1.69603	-2.72076	-5.20696	-5.99022	-3.05582	-2.71208	-1.79593	-3.27746		-9.72064	-15.0883	-9.42052	-5.47458	-28.2278	-29.1696	-20.3716	-13.8977
138_126	-1.44085	-2.5198	-3.99483	-5.15811	-2.03948	-1.79327	-1.85465	-1.4141		-13.8405	-12.1631	-6.99695	-1.06564	-18.5754	-11.8345	-7.85366	-10.9301
138_128	-1.68563	-3.56882	-5.63614	-7.1876	-2.49333	-1.10481	-1.39186	-2.83131		-21.5092	-17.2813	-11.6376	-6.76716	-20.5628	-22.8041	-11.7133	-14.076
138_130	-0.219765	-0.649707	-4.46809	-6.43803	-0.944153	-0.734897	-0.00730162	-0.291848		-3.79595	-4.75277	-5.68198	-1.53314	-13.8072	-9.08937	-0.154751	-5.14887
138_133	-5.47737	-7.83527	-10.9179	-14.2673	-5.37222	-6.16504	-6.71976	-7.95602		4.41197	-3.89932	-2.52174	1.95762	5.38088	6.47391	6.23984	5.74927
138_143	-5.2083	-6.91215	-9.60345	-12.1095	-5.49634	-5.56669	-5.67048	-6.85958		-12.6748	-12.8801	-10.8259	-5.77295	-8.40711	-5.67504	-3.29978	-4.71611
143_014	-2.22984	-3.42001	-7.03521	-9.14978	-3.30347	-3.69748	-4.09874	-4.05258		3.60896	-7.67967	-4.71309	-2.71232	-7.18179	-8.47396	-3.23647	-0.965711
143_015	-8.64581	-10.3478	-13.6147	-17.8148	-6.38061	-6.92861	-7.92491	-10.1785		-4.74211	-3.91187	-0.6891	3.3654	1.57076	2.06382	2.48992	3.94872
143_039	-2.04358	-4.08492	-6.56666	-9.16556	-3.08384	-3.26393	-3.90974	-4.97703		-12.0539	-17.8389	-11.973	-7.15055	-20.8235	-14.4076	-6.55361	-6.51391
143_044	-4.60638	-5.14915	-6.95145	-8.91949	-4.23645	-4.05985	-4.58462	-4.84149		-17.2581	-15.8798	-12.01	-6.84832	-17.3472	-15.5947	-12.2646	-14.1127
143_048	-4.83707	-5.81634	-8.36952	-10.8109	-3.47458	-3.44439	-4.30433	-5.64375		-15.0364	-15.3028	-12.8977	-8.77201	-12.9301	-9.56928	-7.08253	-4.48139
143_049	-11.3802	-14.1129	-17.8932	-23.4676	-10.4553	-12.2849	-14.2133	-15.0011		1.42859	1.70436	1.75405	3.36895	3.93249	4.47144	5.02903	4.82822
143_051	-9.06134	-9.11402	-14.3089	-16.7627	-7.84753	-9.38477	-11.1659	-12.6693		3.86747	4.38104	1.8101	7.22887	4.39241	5.75839	6.31279	6.88729
143_053	-2.2993	-2.40646	-5.41159	-7.50642	-2.61487	-2.35626	-2.81455	-2.67151		-12.3497	-13.3178	-11.9294	-6.74206	-14.9456	-11.7875	-8.86381	-8.57031
