# Supplementary material for: Frequency-Dependent Action of Neuromodulation
Source: eNeuro. 2021 Nov 8;8(6):ENEURO.0338-21.2021. doi: 10.1523/ENEURO.0338-21.2021 (PMC8584230; doi:10.1523/ENEURO.0338-21.2021)
Supplement: Extended Data Figure 4-2 — Data for panel C. Download Figure 4-2, XLSX file. [file enu-eN-NWR-0338-21-s11.xlsx]

## Sheet: Tabelle1
slope	100 mV/s	200 mV/s	400 mV/s	100 mV/s	200 mV/s	400 mV/s		100 mV/s	200 mV/s	400 mV/s	100 mV/s	200 mV/s	400 mV/s
direction	positive	positive	positive	negative	negative	negative		positive	positive	positive	negative	negative	negative
Experiment	I_max (nA)	I_max (nA)	I_max (nA)	I_max (nA)	I_max (nA)	I_max (nA)		V_I_max (mV)	V_I_max (mV)	V_I_max (mV)	V_I_max (mV)	V_I_max (mV)	V_I_max (mV)
138_133	-3.80571	-4.40327	-4.93062	-1.94868	-1.74815	-1.95052		-7.63563	-3.26642	1.53882	-8.92007	-9.48004	-8.85744
138_143	-3.06727	-3.412	-2.97781	-2.93419	-2.6687	-1.98075		-13.5461	-7.869	-4.62353	-17.5949	-16.0936	-16.6394
143_014	-2.36541	-2.61796	-3.32112	-1.66403	-1.61881	-2.02137		-10.0885	-5.31692	-1.82905	-7.9144	-7.97862	-10.4725
143_015	-4.29866	-5.01886	-5.28007	-2.02017	-1.65005	-2.09151		0.127361	3.30789	8.65563	-14.5557	-4.74697	-7.19234
143_039	-2.23661	-2.42001	-2.78015	-2.34932	-1.76385	-2.0517		-26.8051	-25.8251	-20.0572	-17.0077	-13.8322	-9.80903
143_044	-4.33317	-3.83171	-3.80929	-3.5235	-2.82957	-2.78344		-14.9189	-11.0433	-8.49416	-6.19091	-14.9845	-14.3137
143_048	-0.00763195	-0.0108528	-1.89601	-1.56922	-1.41434	-1.13864		-0.121342	-0.107761	-12.0644	-18.6754	-25.0906	-21.4631
143_049	-5.29579	-4.51695	-4.32541	-3.56513	-3.50904	-3.73375		-0.903035	1.66343	3.97569	-1.83922	-4.85323	-3.76981
143_051	-2.70636	-3.54346	-4.00433	-1.53336	-2.64431	-3.44315		-6.53068	-0.858331	1.44746	-26.5933	-3.3336	-2.74424
143_053	-0.0100535	-0.776642	-0.677016	-0.972286	-1.00948	-0.0062356		-0.100677	-7.72767	-8.67466	-12.8319	-15.5434	-0.212318
