# Supplementary material for: Frequency-Dependent Action of Neuromodulation
Source: eNeuro. 2021 Nov 8;8(6):ENEURO.0338-21.2021. doi: 10.1523/ENEURO.0338-21.2021 (PMC8584230; doi:10.1523/ENEURO.0338-21.2021)
Supplement: Extended Data Figure 5-1 — RM ANOVA for parameters obtained with realistic waveform stimulation. Download Figure 5-1, XLSX file. [file enu-eN-NWR-0338-21-s12.xlsx]

## Sheet: Tabelle1
Parameter	N	Factor	DF	F	p	Power
I_max	13	Cycle Frequency	4, 48	15.281	<0.001	1
ϕ_I_max	13	Cycle Frequency	4, 48	9.072	<0.001	0.998
