# Supplementary material for: Frequency-Dependent Action of Neuromodulation
Source: eNeuro. 2021 Nov 8;8(6):ENEURO.0338-21.2021. doi: 10.1523/ENEURO.0338-21.2021 (PMC8584230; doi:10.1523/ENEURO.0338-21.2021)
Supplement: Extended Data Figure 5-2 — Data for panel B. Download Figure 5-2, XLSX file. [file enu-eN-NWR-0338-21-s13.xlsx]

## Sheet: Tabelle1
cycle frq.	0.5 Hz	1 Hz	1.5 Hz	2 Hz	4 Hz		0.5 Hz	1 Hz	1.5 Hz	2 Hz	4 Hz
Experiment	I_max (nA)	I_max (nA)	I_max (nA)	I_max (nA)	I_max (nA)		phase_I_max	phase_I_max	phase_I_max	phase_I_max	phase_I_max
138_111	-1.79172	-2.09345	-1.98081	-1.98332	-1.1598		0.2744	0.279	0.300267	0.3016	0.3216
138_114	-2.34035	-2.12206	-2.19027	-2.91439	-1.29546		0.4083	0.3506	0.3824	0.3196	0.3392
138_115	-2.68516	-4.08399	-4.37775	-4.86161	-2.88447		0.281	0.2786	0.345067	0.3136	0.3264
138_125	-2.13602	-2.09455	-2.40027	-1.91432	-1.79884		0.3166	0.3602	0.2984	0.36	0.4176
138_126	-1.71257	-1.74265	-1.99825	-1.88655	-1.7931		0.2773	0.2792	0.3024	0.3316	0.3496
138_128	-3.01748	-2.74382	-3.02705	-3.5722	-2.2769		0.2759	0.3582	0.345867	0.3284	0.3352
138_130	-1.17368	-1.1453	-1.09132	-0.956131	-0.243226		0.2782	0.3488	0.3152	0.3448	0.4144
138_133	-2.34943	-2.06378	-2.26471	-2.10727	-1.62398		0.28	0.3526	0.3384	0.3244	0.3816
138_143	-3.92174	-4.66714	-4.82781	-5.01562	-3.36992		0.2739	0.2826	0.306667	0.3188	0.336
143_014	-2.6502	-2.59437	-2.65247	-2.70879	-1.78961		0.3226	0.3508	0.3392	0.3328	0.3816
143_015	-4.08009	-3.76109	-3.68137	-3.53241	-2.25243		0.3236	0.3524	0.339733	0.3252	0.3312
143_039	-2.86478	-3.08846	-3.09736	-3.20405	-2.07388		0.2356	0.271	0.286133	0.3116	0.348
143_044	-4.71216	-5.6665	-6.16285	-6.75073	-5.30496		0.2749	0.2812	0.299467	0.3192	0.332
