# Supplementary material for: Frequency-Dependent Action of Neuromodulation
Source: eNeuro. 2021 Nov 8;8(6):ENEURO.0338-21.2021. doi: 10.1523/ENEURO.0338-21.2021 (PMC8584230; doi:10.1523/ENEURO.0338-21.2021)
Supplement: Extended Data Figure 7-1 — Two-way RM ANOVA for steady state I-V parameters at small stimulus amplitude (ramp-and-hold). α = 0.05. Directions: positive or negative. Slope (in mV/s): 40, 80, 160. Download Figure 7-1, XLSX file. [file enu-eN-NWR-0338-21-s14.xlsx]

## Sheet: Tabelle1
Parameter	N	Factor	DF	F	p	Power
I_max	6	Direction	1, 5	0.428	0.542	0.05
		Slope	2, 10	0.389	0.687	0.05
		Direction x Slope	2, 10	1.339	0.305	0.0885
V_I_max	6	Direction	1, 5	16.146	0.01	0.878
		Slope	2, 10	0.476	0.634	0.05
		Direction x Slope	2, 10	0.639	0.548	0.05
