# Supplementary material for: Frequency-Dependent Action of Neuromodulation
Source: eNeuro. 2021 Nov 8;8(6):ENEURO.0338-21.2021. doi: 10.1523/ENEURO.0338-21.2021 (PMC8584230; doi:10.1523/ENEURO.0338-21.2021)
Supplement: Extended Data Figure 8-1 — Two-way RM ANOVA for initial state I-V parameters (ramps) in Cd2+ saline. α = 0.05. Direction: positive or negative. Slope (in mV/s): 50, 100, 200, 400. Download Figure 8-1, XLSX file. [file enu-eN-NWR-0338-21-s16.xlsx]

## Sheet: Tabelle1
Parameter	N	Factor	DF	F	p	Power
I_max	6	Direction	1, 3	6.098	0.09	0.346
		Slope	3, 9	3.535	0.061	0.435
		Direction x Slope	3, 9	10.608	0.003	0.964
V_I_max	6	Direction	1, 3	6.136	0.089	0.3448
		Slope	3, 9	0.932	0.464	0.05
		Direction x Slope	3, 9	1.76	0.225	0.152
