# Supplementary material for: Frequency-Dependent Action of Neuromodulation
Source: eNeuro. 2021 Nov 8;8(6):ENEURO.0338-21.2021. doi: 10.1523/ENEURO.0338-21.2021 (PMC8584230; doi:10.1523/ENEURO.0338-21.2021)
Supplement: Extended Data Figure 8-2 — Two-way ANOVA for the slopes of the linear fits across ramps with the same direction. α = 0.05. Direction: positive or negative. Saline: normal or Cd2+. Failed normality and equal variance tests. Download Figure 8-2, XLSX file. [file enu-eN-NWR-0338-21-s17.xlsx]

## Sheet: Tabelle1
Parameter	N	Factor	DF	F	p	Power
Slope	38 (normal saline); 4 (Cd2+)	Direction	1, 38	0.663	0.421	0.05
		Saline	1, 38	4.053	0.051	0.384
		Direction x Saline	1, 38	1.198	0.281	0.068
