# Supplementary material for: Frequency-Dependent Action of Neuromodulation
Source: eNeuro. 2021 Nov 8;8(6):ENEURO.0338-21.2021. doi: 10.1523/ENEURO.0338-21.2021 (PMC8584230; doi:10.1523/ENEURO.0338-21.2021)
Supplement: Extended Data Figure 8-6 — Data for Extended Data Figure 8-3E. Download Figure 8-6, XLSX file. [file enu-eN-NWR-0338-21-s21.xlsx]

## Sheet: Tabelle1
ramp slope	100 mV/s	200 mV/s	400 mV/s	100 mV/s	200 mV/s	400 mV/s
parameter	initial	initial	initial	steady	steady	steady
Experiment	I_max (nA)	I_max (nA)	I_max (nA)	I_max (nA)	I_max (nA)	I_max (nA)
143_055	4.41434	5.67804	5.29994	3.5191	4.03231	4.12564
143_056	1.74753	2.27296	2.43214	1.45448	1.53145	1.78871
143_062	2.12973	2.11097	2.12541	1.58125	1.5635	2.0322
143_066	2.83701	3.0067	2.98857	2.53399	2.61409	2.81588
