# Supplementary material for: Frequency-Dependent Action of Neuromodulation
Source: eNeuro. 2021 Nov 8;8(6):ENEURO.0338-21.2021. doi: 10.1523/ENEURO.0338-21.2021 (PMC8584230; doi:10.1523/ENEURO.0338-21.2021)
Supplement: Extended Data Figure 9-1 — Data for panel Bii. Download Figure 9-1, XLSX file. [file enu-eN-NWR-0338-21-s22.xlsx]

## Sheet: Tabelle1
	IMI + IMI-T(Ca)		IMI only		IMI-T(Ca)
Frequency (Hz)	phase on	phase off	phase on	phase off	phase on	phase off
0.5	0.288425	0.68235	0.2837	0.778013	0.301738	0.525825
1	0.357275	0.708125	0.342	0.7547	0.38335	0.6843
1.66	0.493167	0.744042	0.438	0.771792	0.563958	0.792833
